# Supplementary material for: Comparative analysis of early immune responses induced by two strains of Newcastle disease virus in chickens
Source: PubMed Central journal article supplement (PMC6460277; doi:10.1002/mbo3.701), 2018-08-01
Supplement: MBO3-8-e00701-s001.pdf [file MBO3-8-e00701-s001.pdf]

Tingting Zhang <sup>1,2†</sup>, Mengting Ren <sup>1,2†</sup>, Chenggang Liu <sup>1,2</sup>, Liwen Xu <sup>1,2</sup>, Fangfang Wang <sup>1,2</sup>, Zongxi Han <sup>2</sup>, Yuhao Shao <sup>2</sup>, Deying Ma <sup>1\*</sup>

<sup>1</sup> College of Animal Science and Technology, Northeast Agricultural University, Harbin 150030, PR China.

<sup>2</sup> Division of Avian Infectious Diseases, State Key Laboratory of Veterinary Biotechnology, Harbin Veterinary Research Institute, Chinese Academy of Agricultural Sciences, Harbin 150001, PR China.

† Tingting Zhang and Mengting Ren are joint first author.

\* Corresponding author

Deying Ma

E-mail: [madeying@neau.edu.cn](mailto:madeying@neau.edu.cn)

**Figure S1.** Relative gene expression levels of MyD88 and IRF-7 in tissues of chickens challenged with Newcastle disease virus (NDV) strain GD (Md/CH/LGD/1/2005) and NDV strain F48E9, respectively. The cDNA copy numbers in tissue samples were measured by quantitative RT-PCR. The mRNA expression levels of target genes were normalized to that of 18S rRNA in the same samples. Each bar is the mean  $\pm$  SD. <sup>a, b</sup> Values with different superscripted letters are significantly different ( $P < 0.05$ ).

**Figure S2.** Relative gene expression levels of NF- $\kappa$ B in tissues of chickens challenged with Newcastle disease virus (NDV) genotype VIIId strain GD (Md/CH/LGD/1/2005) and NDV strain F48E9, respectively. The cDNA copy numbers in tissue samples were measured by quantitative RT-PCR. The mRNA expression levels of target genes were normalized to that of 18S rRNA in the same samples. Each bar is the mean  $\pm$  SD. <sup>a, b</sup> Values with different superscripted letters are significantly different ( $P < 0.05$ ).

**Figure S3.** Relative gene expression levels of Fas/FasL, MHC class I, and MHC class II in tissues of chickens challenged with Newcastle disease virus (NDV) strain GD (Md/CH/LGD/1/2005) and NDV strain F48E9, respectively. The cDNA copy numbers in tissue samples were measured by quantitative RT-PCR. The mRNA expression levels of target genes were normalized to that of 18S rRNA in the same samples. Each bar is the mean  $\pm$  SD. <sup>a, b</sup> Values with different superscripted letters are significantly different ( $P < 0.05$ ).

Fig.S1

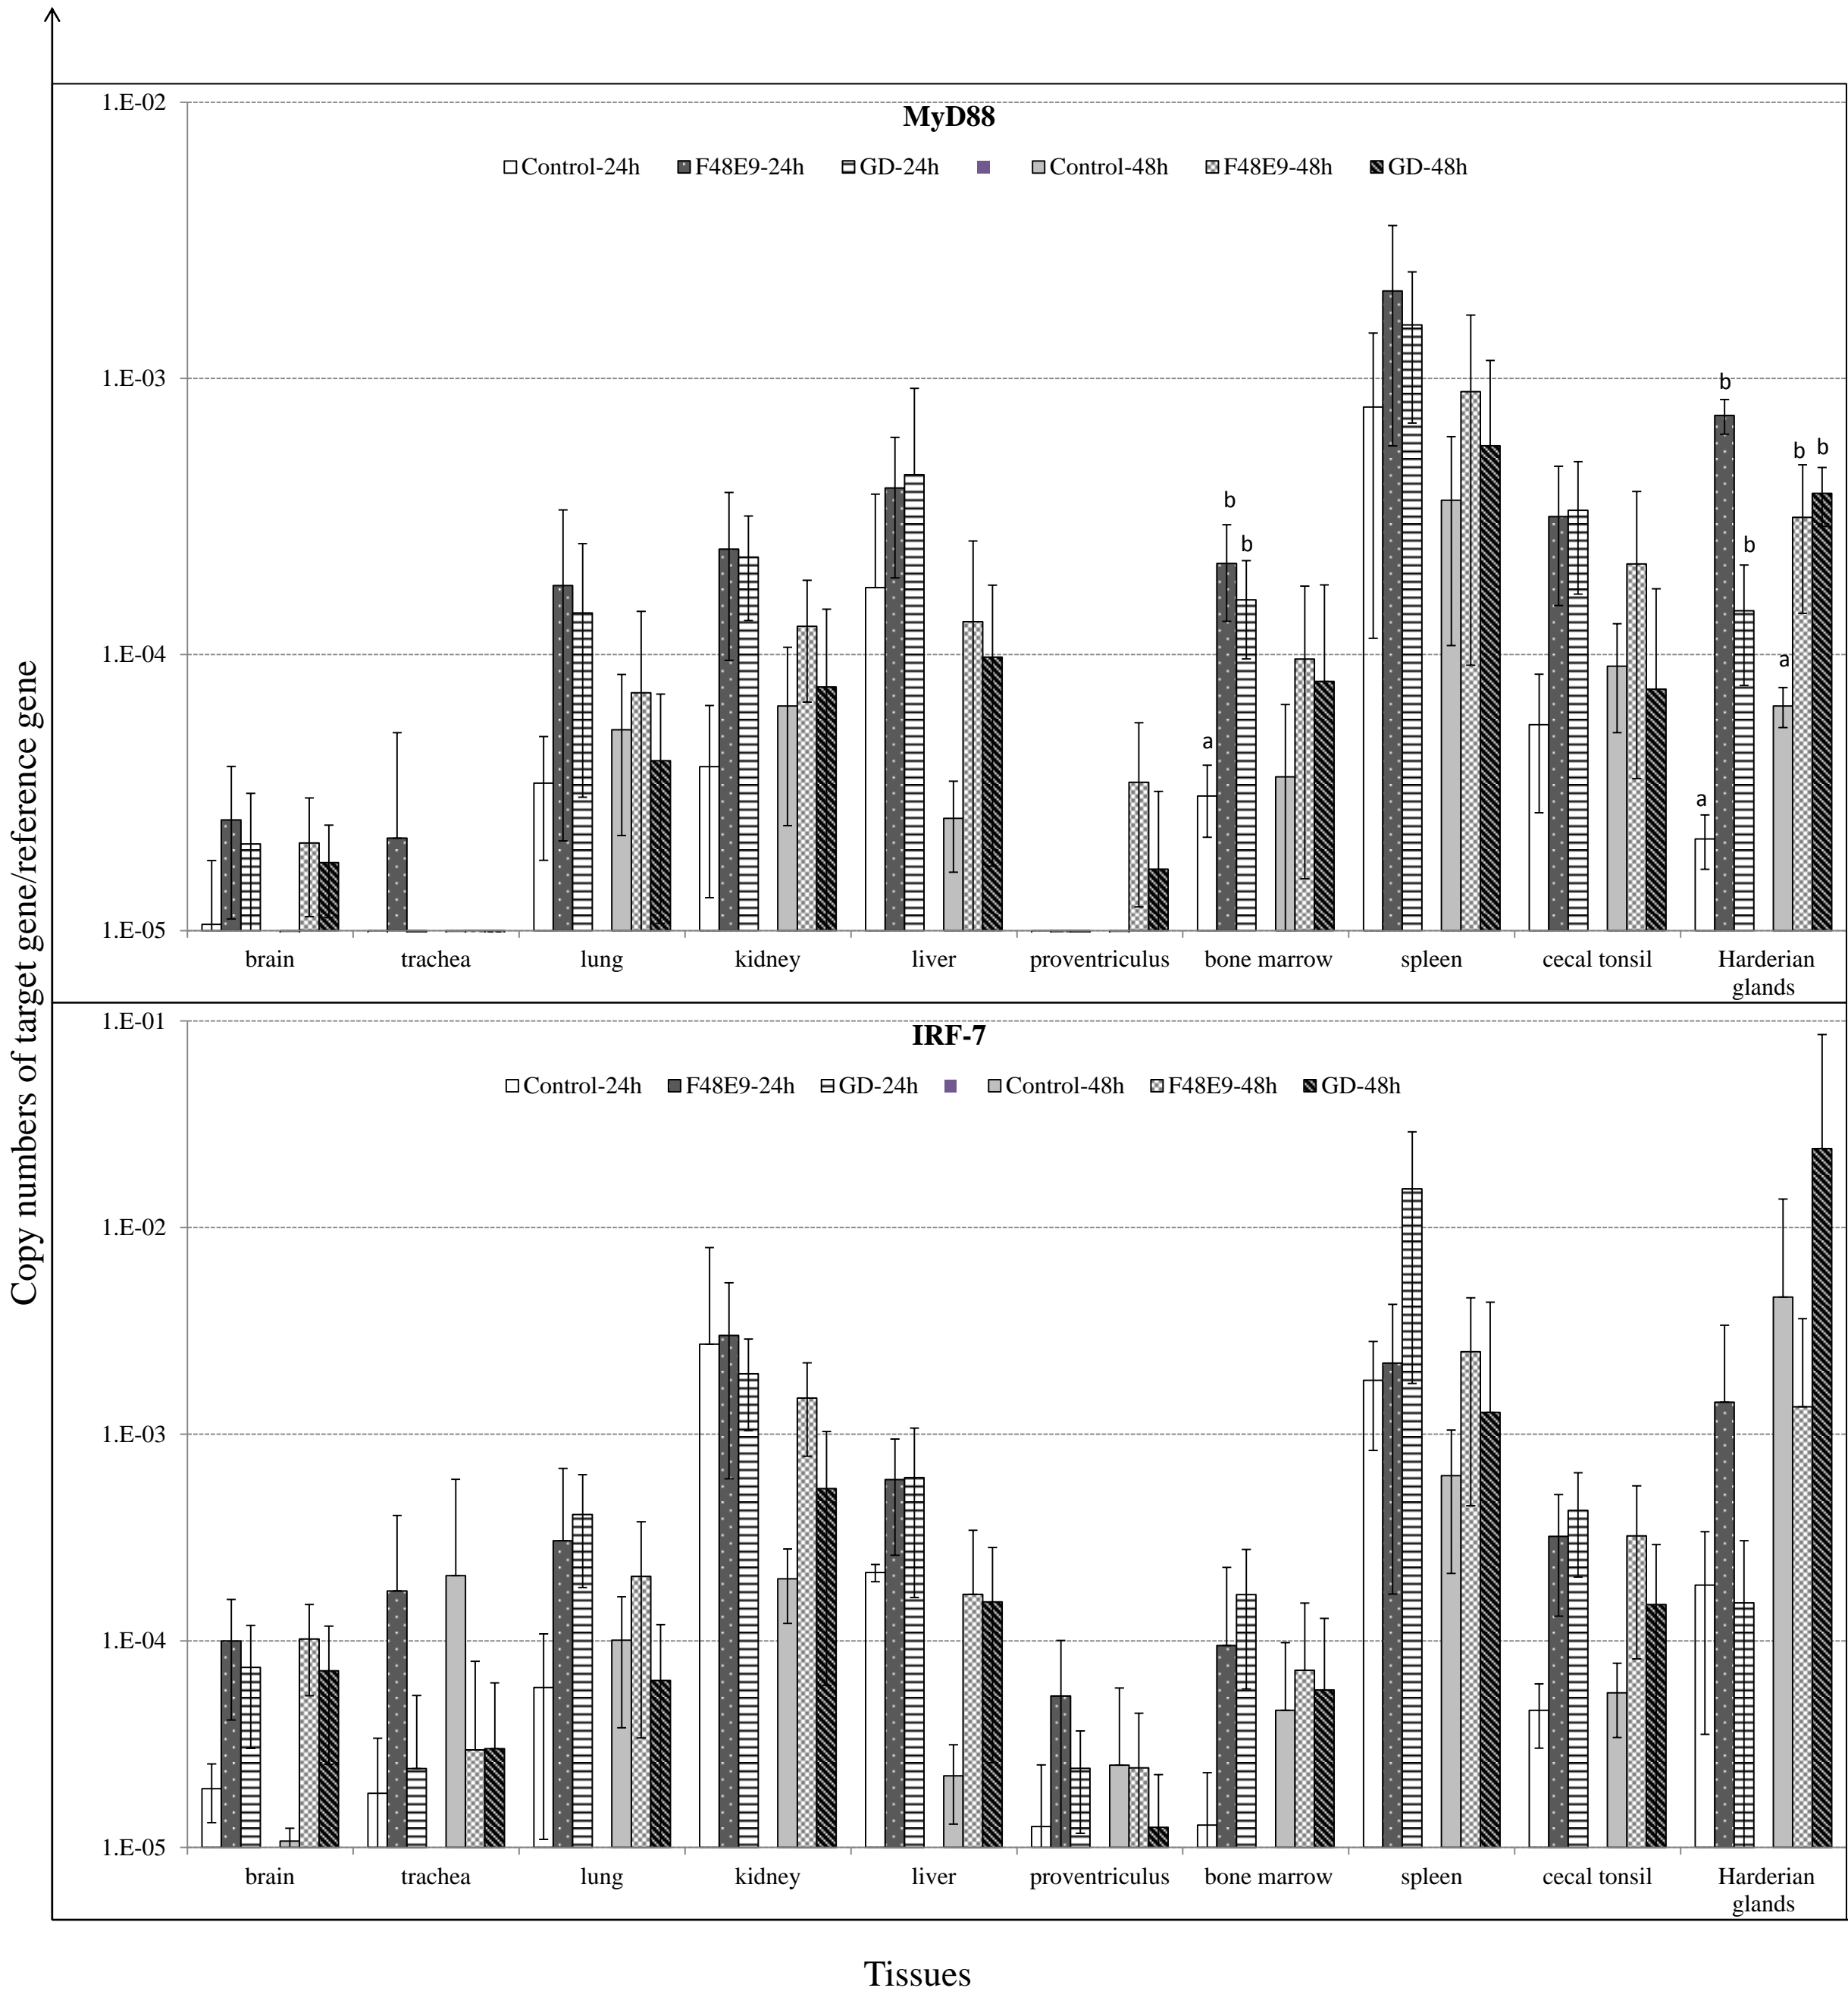

Fig.S2

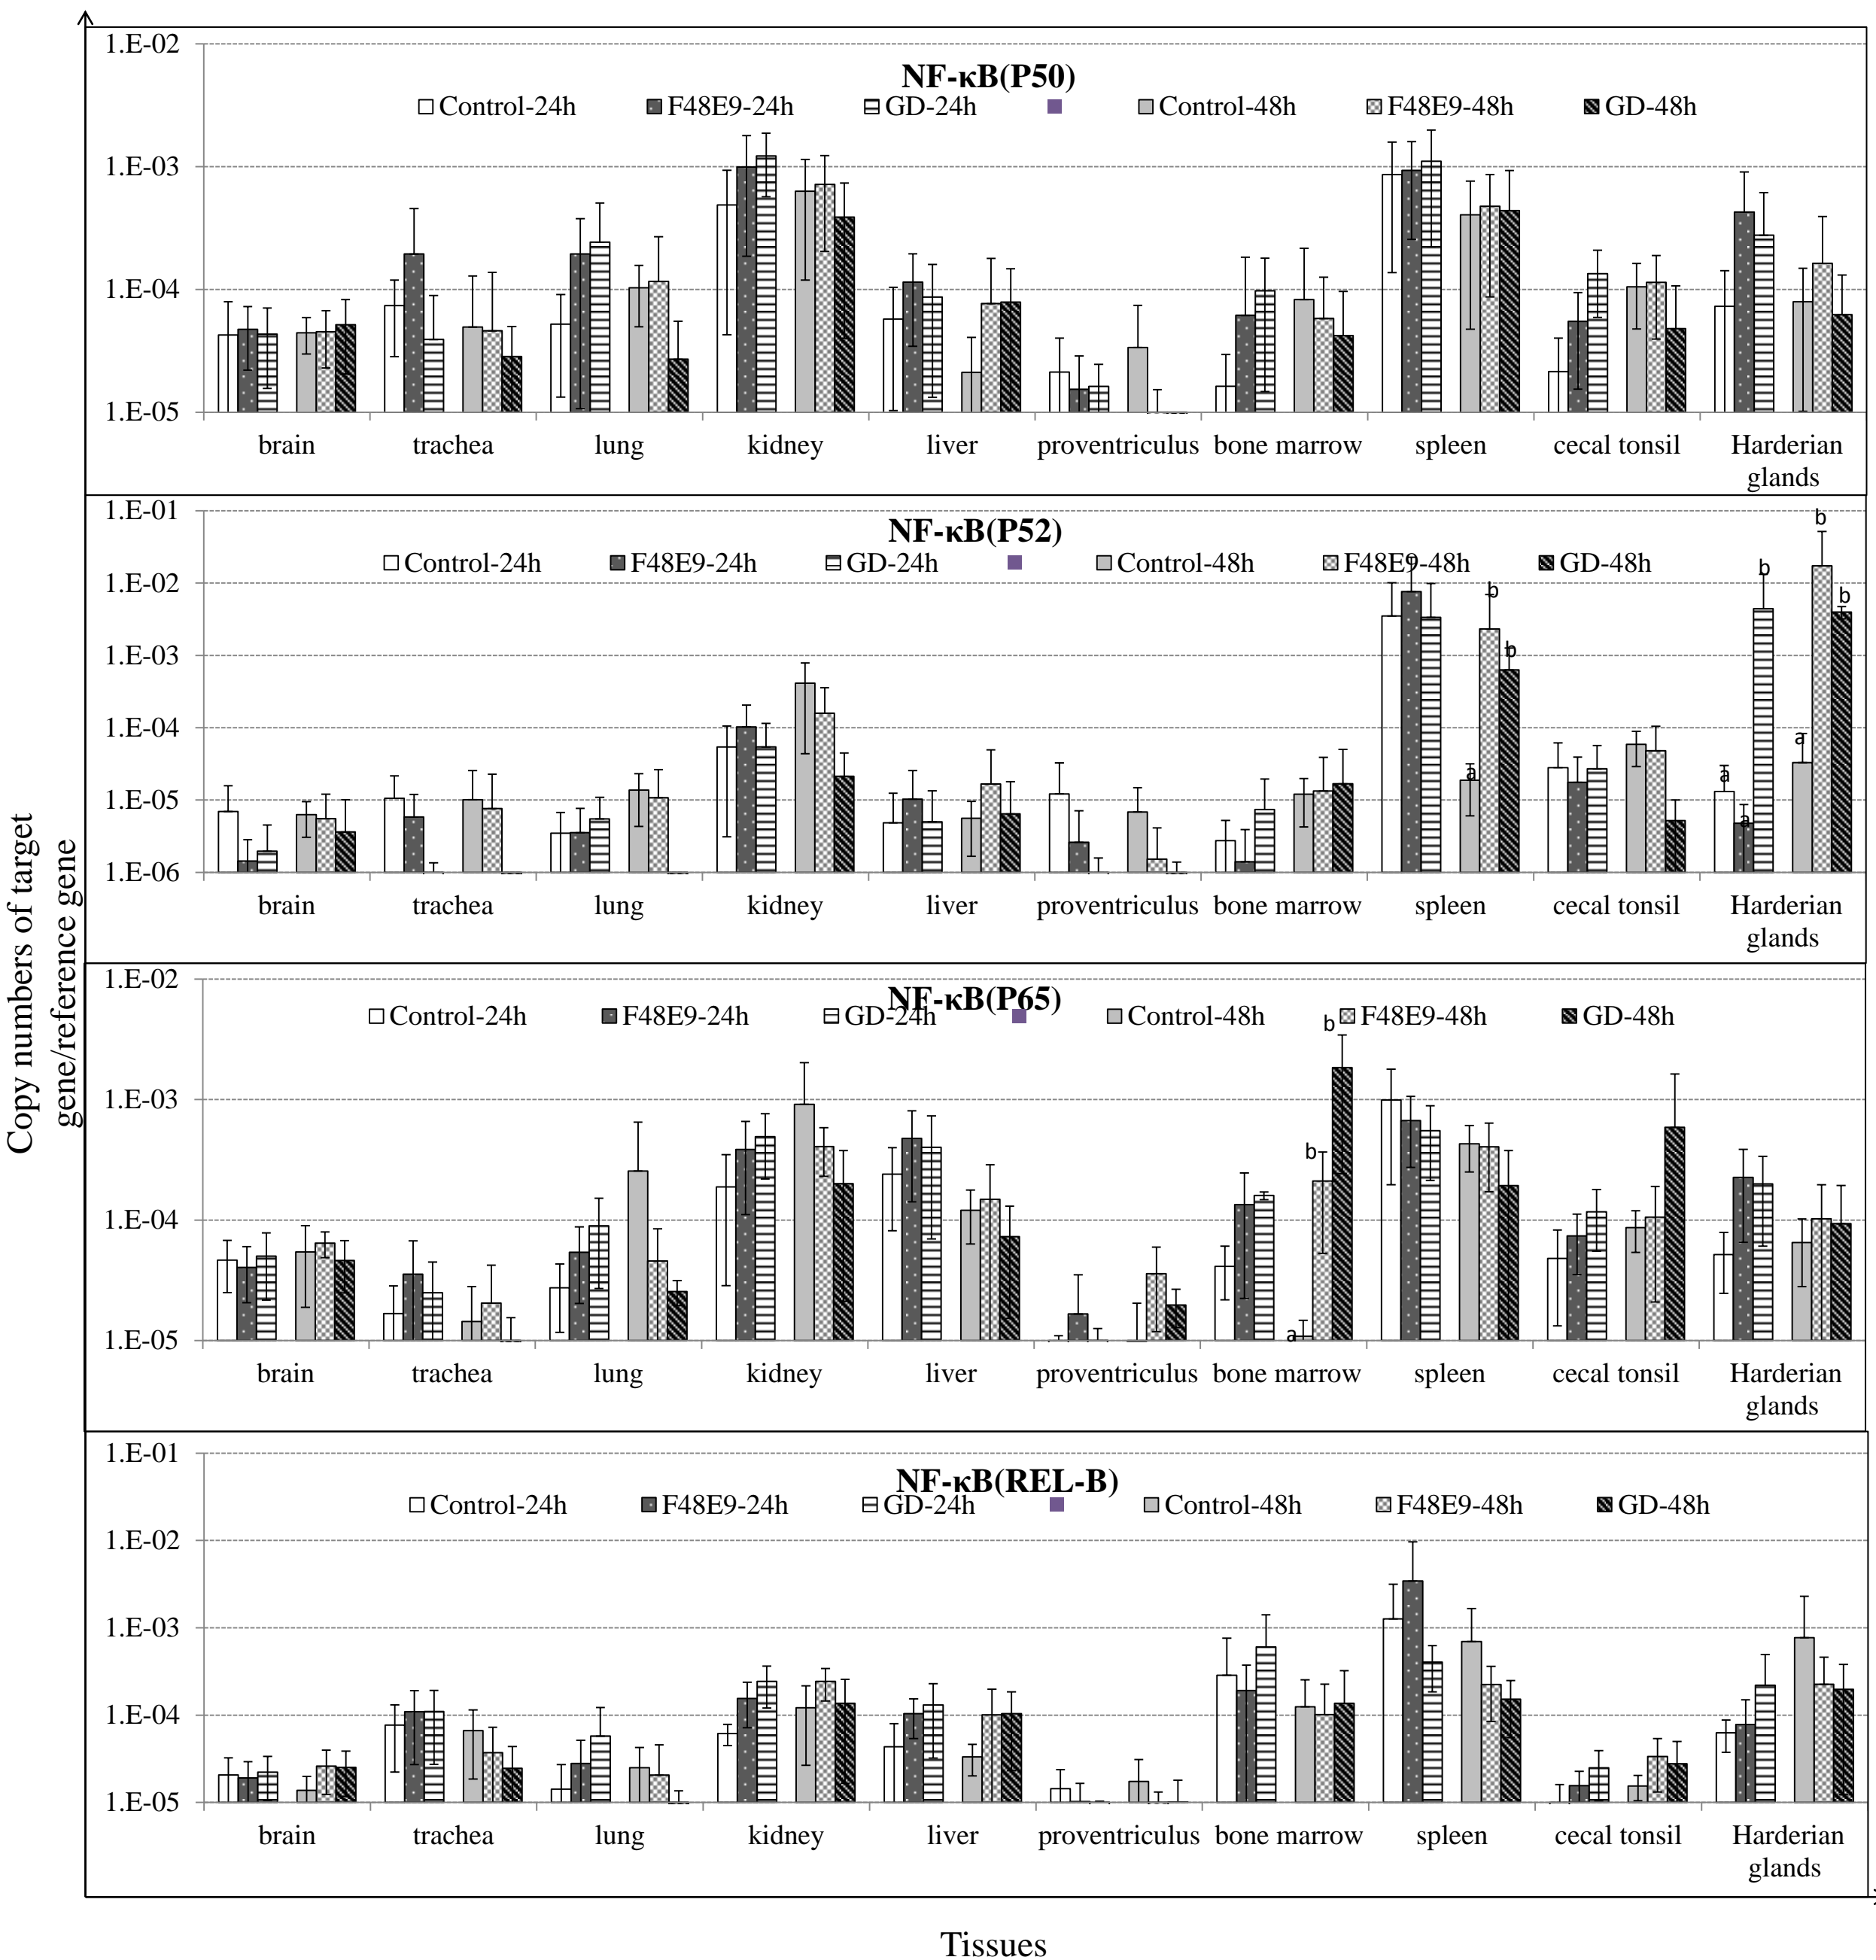

Fig.S3

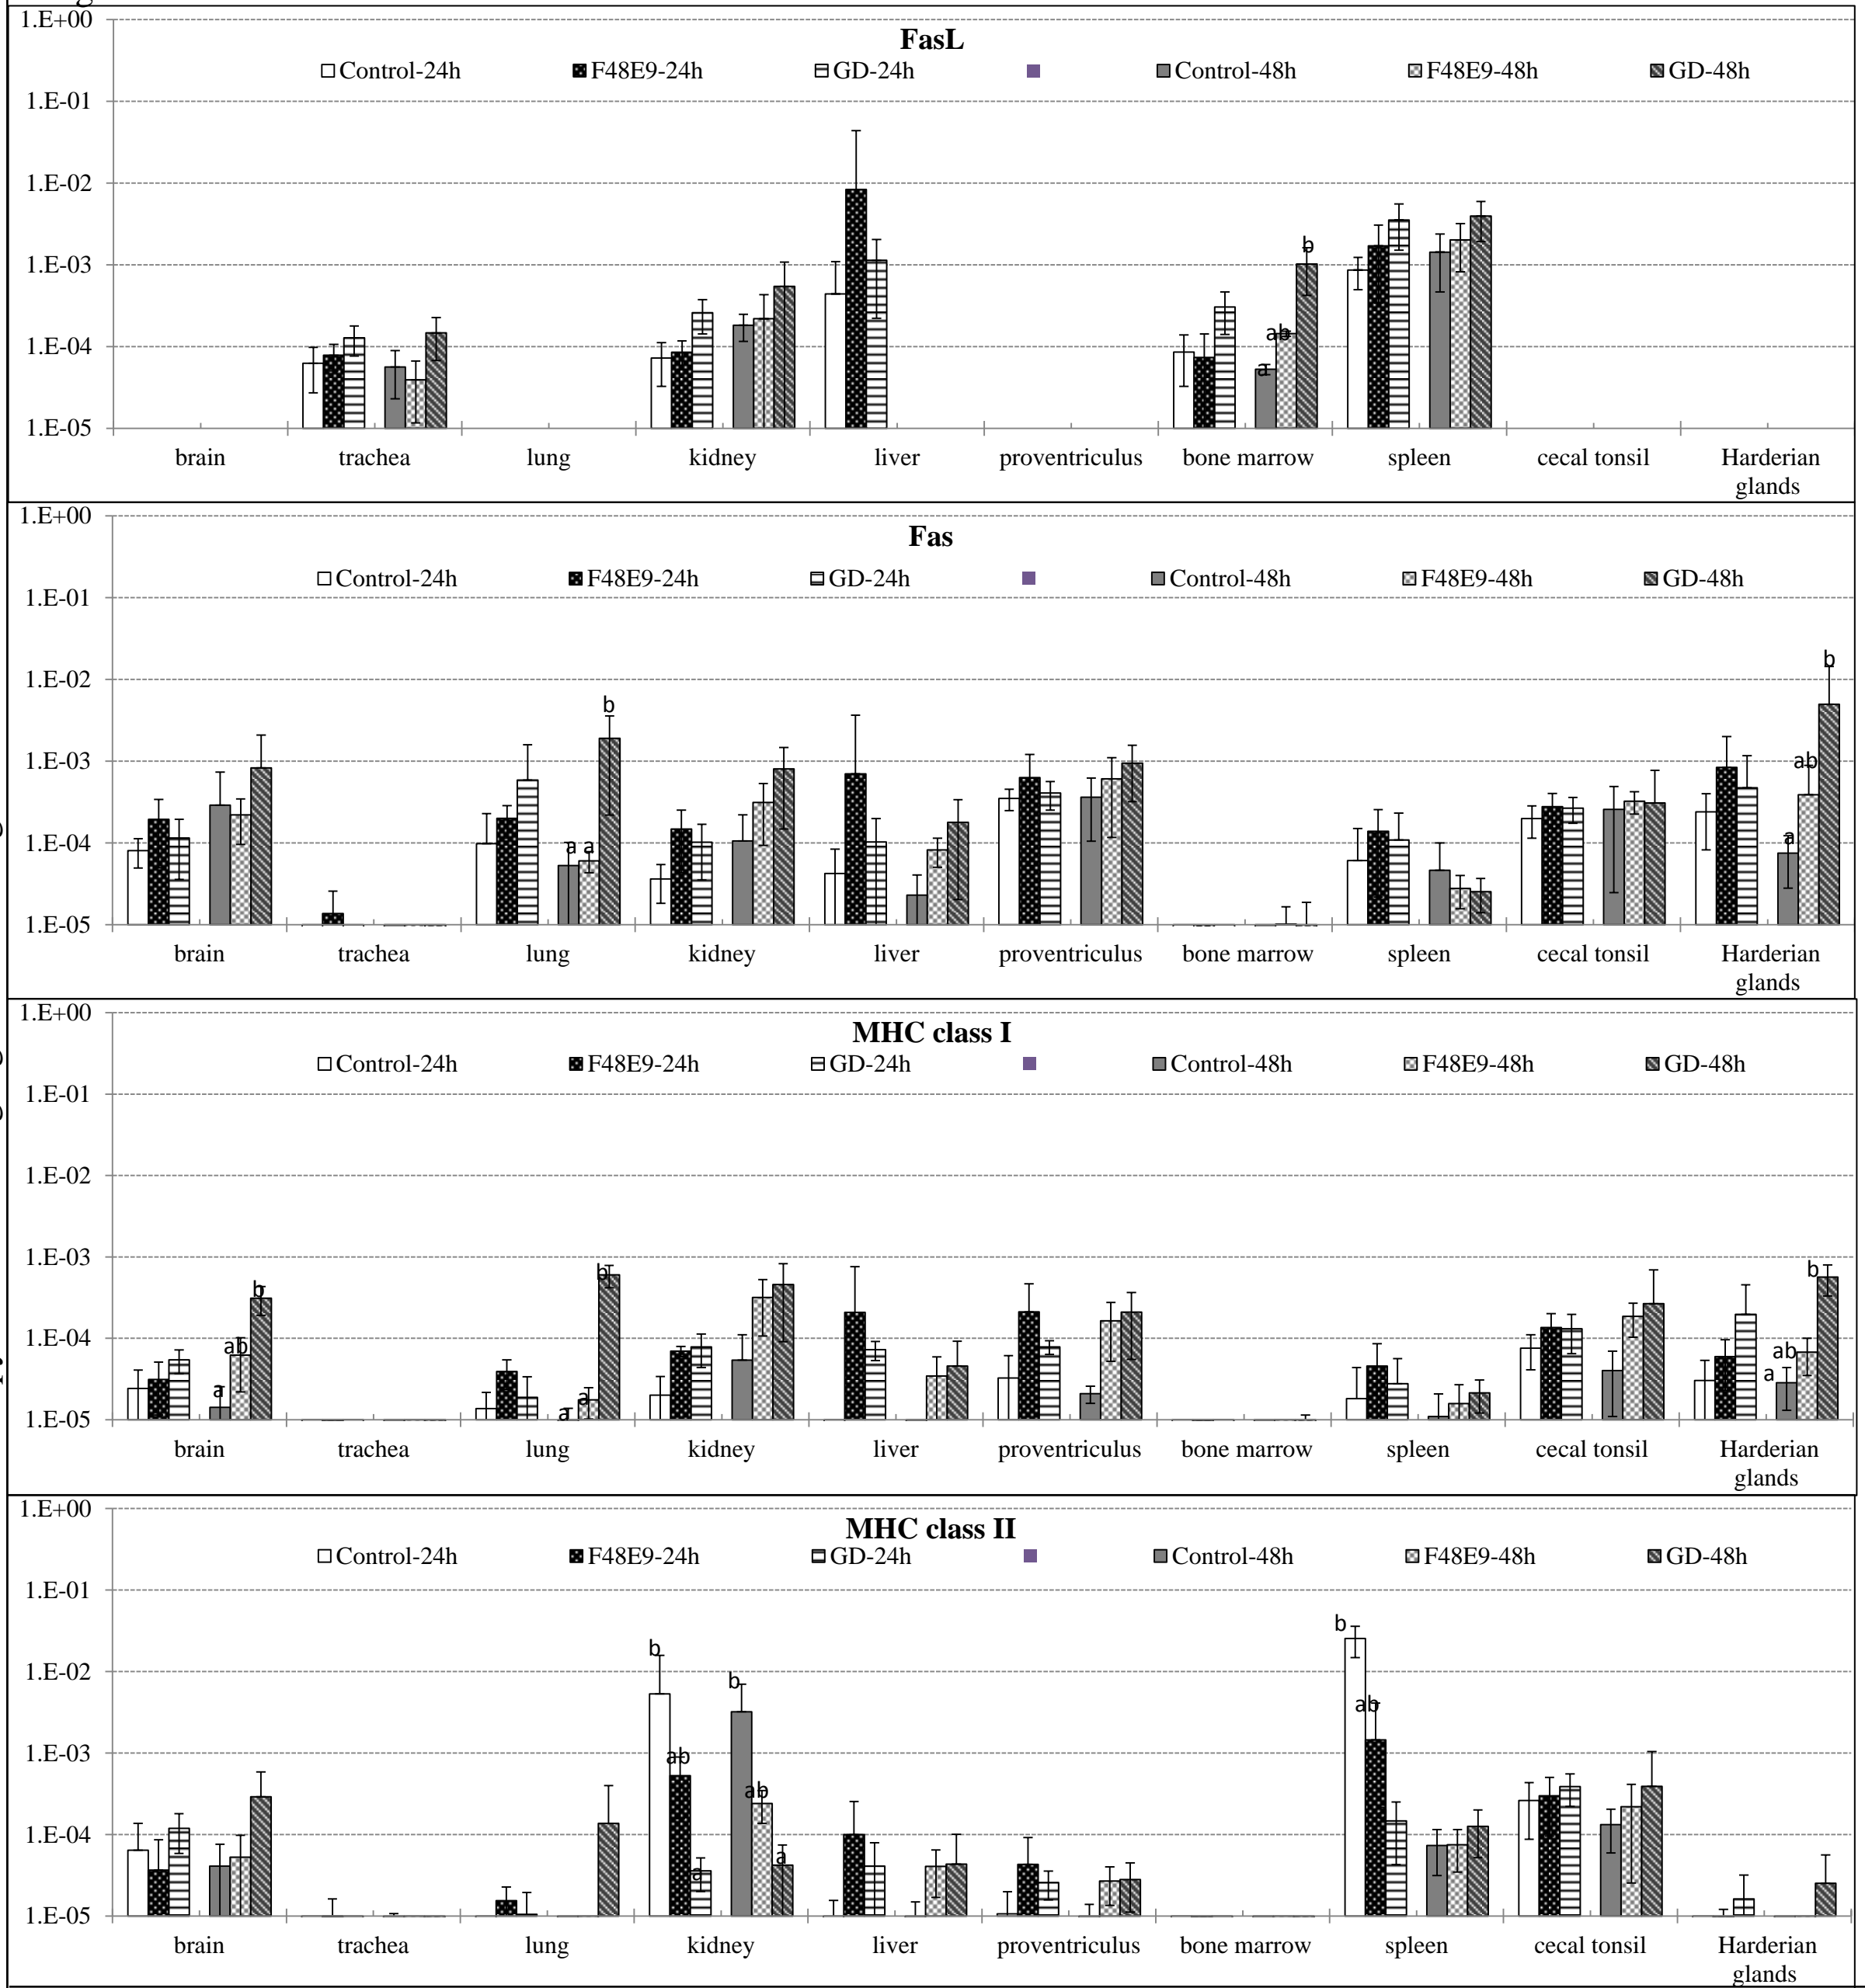

Tissues
